# Supplementary material
Source: PubMed Central journal article supplement (PMC2323276)

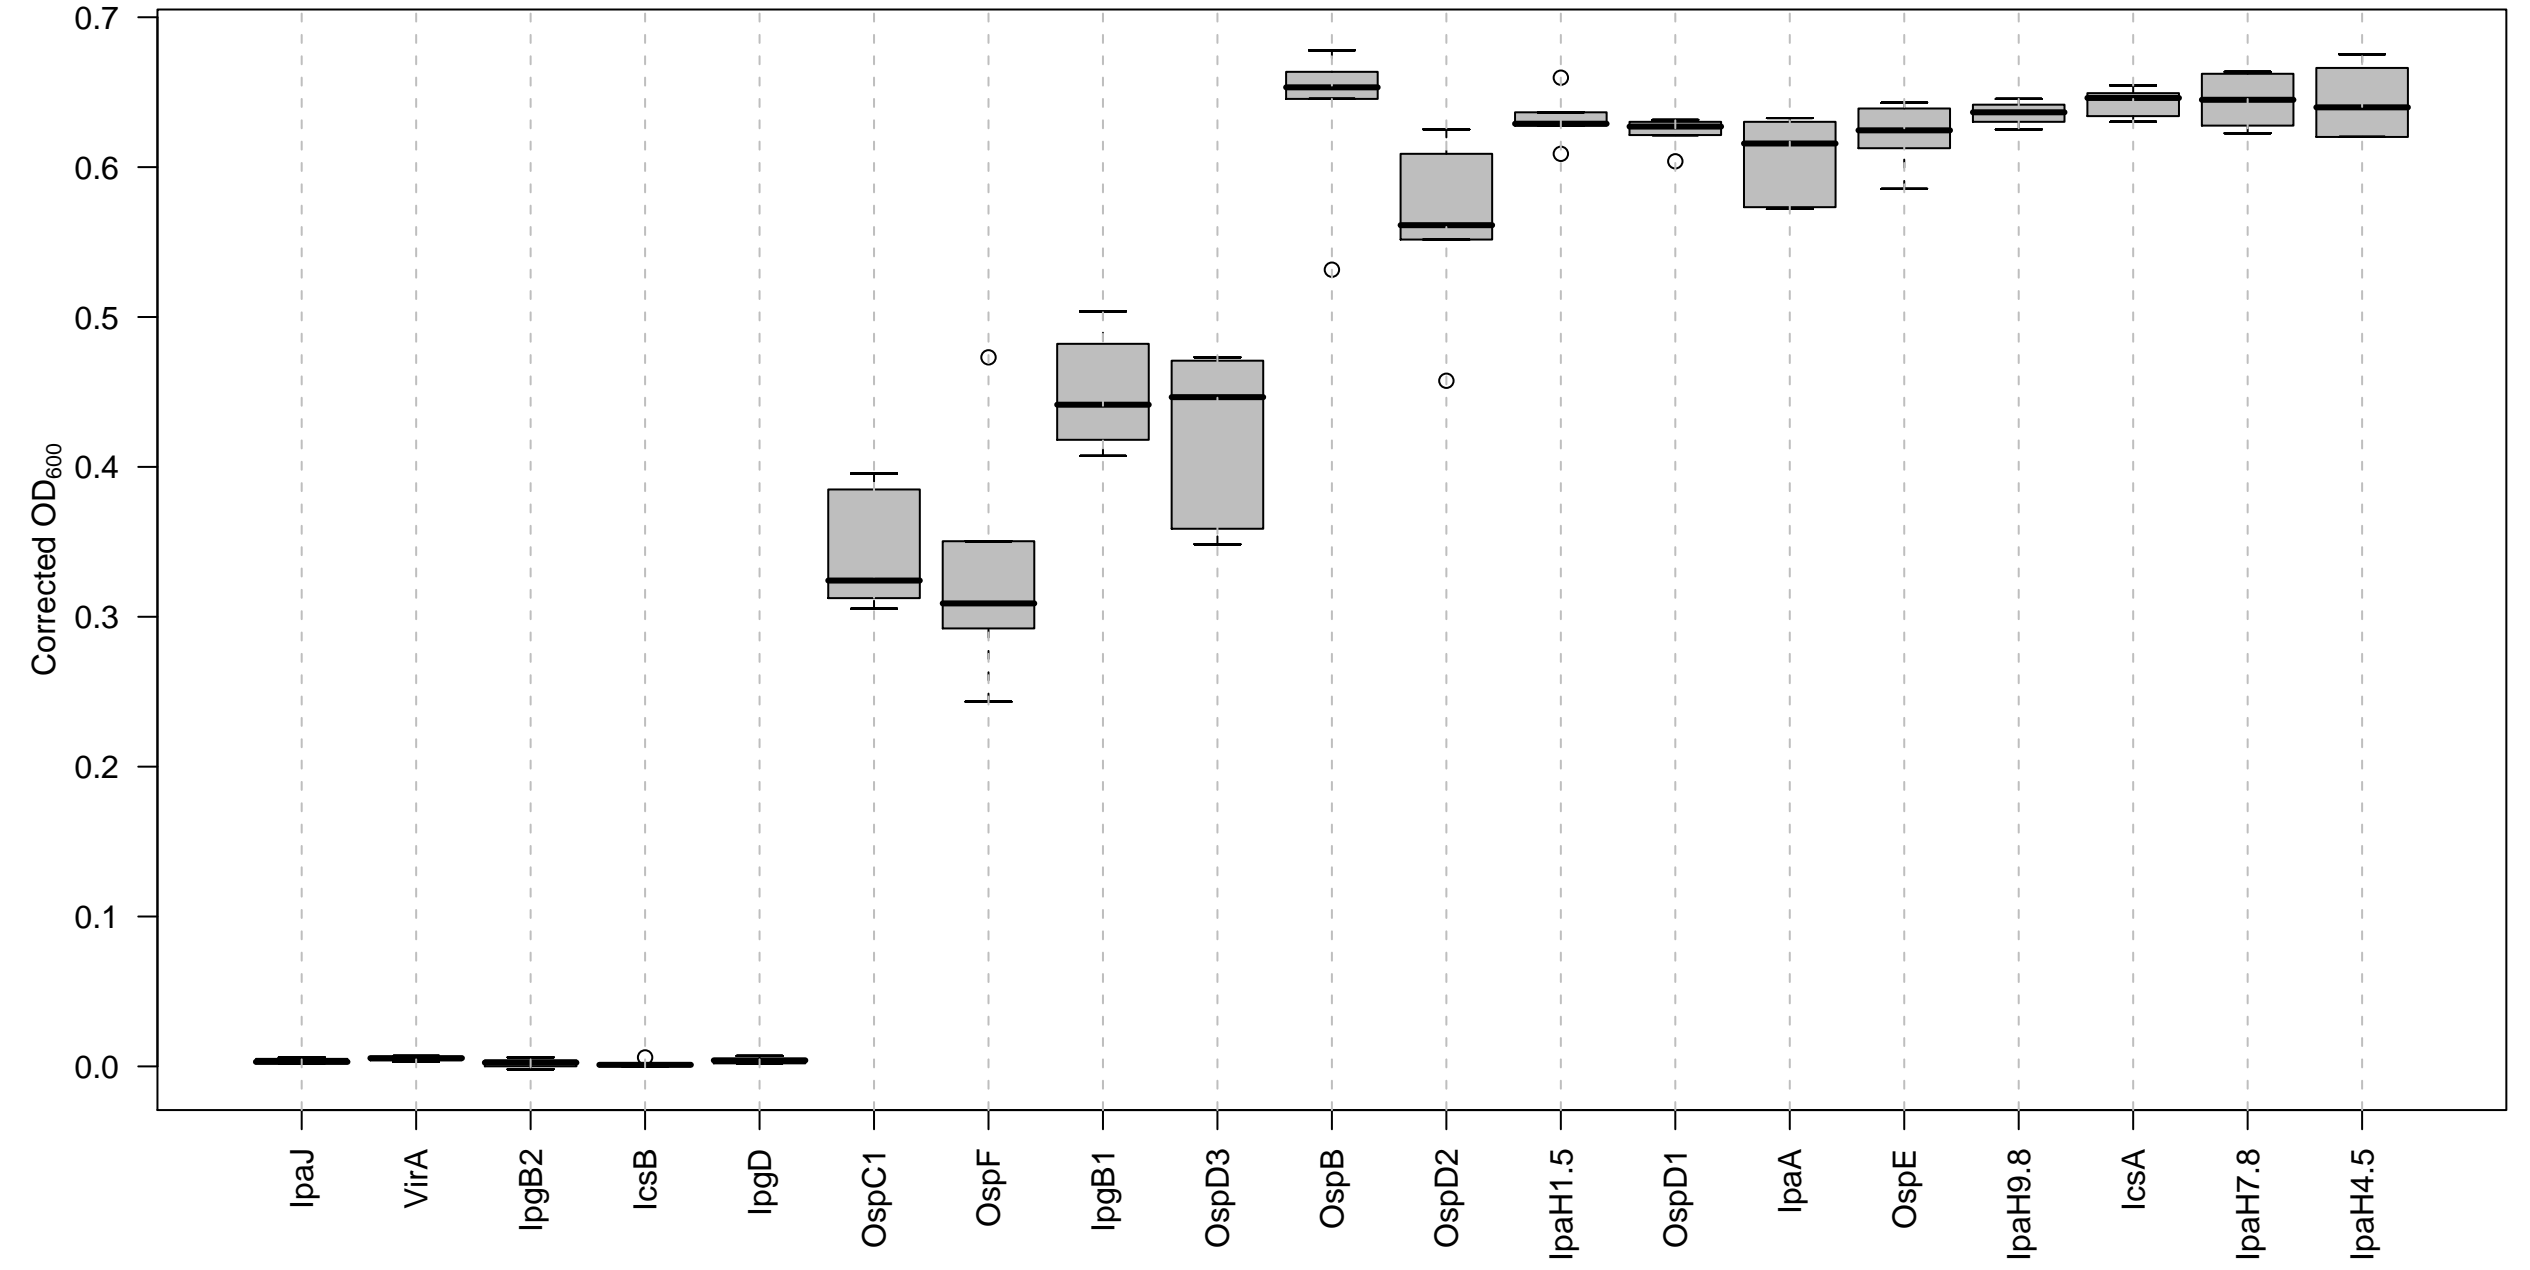

Supplement: ppat.0040009.sg003.pdf [file ppat.0040009.sg003.pdf]

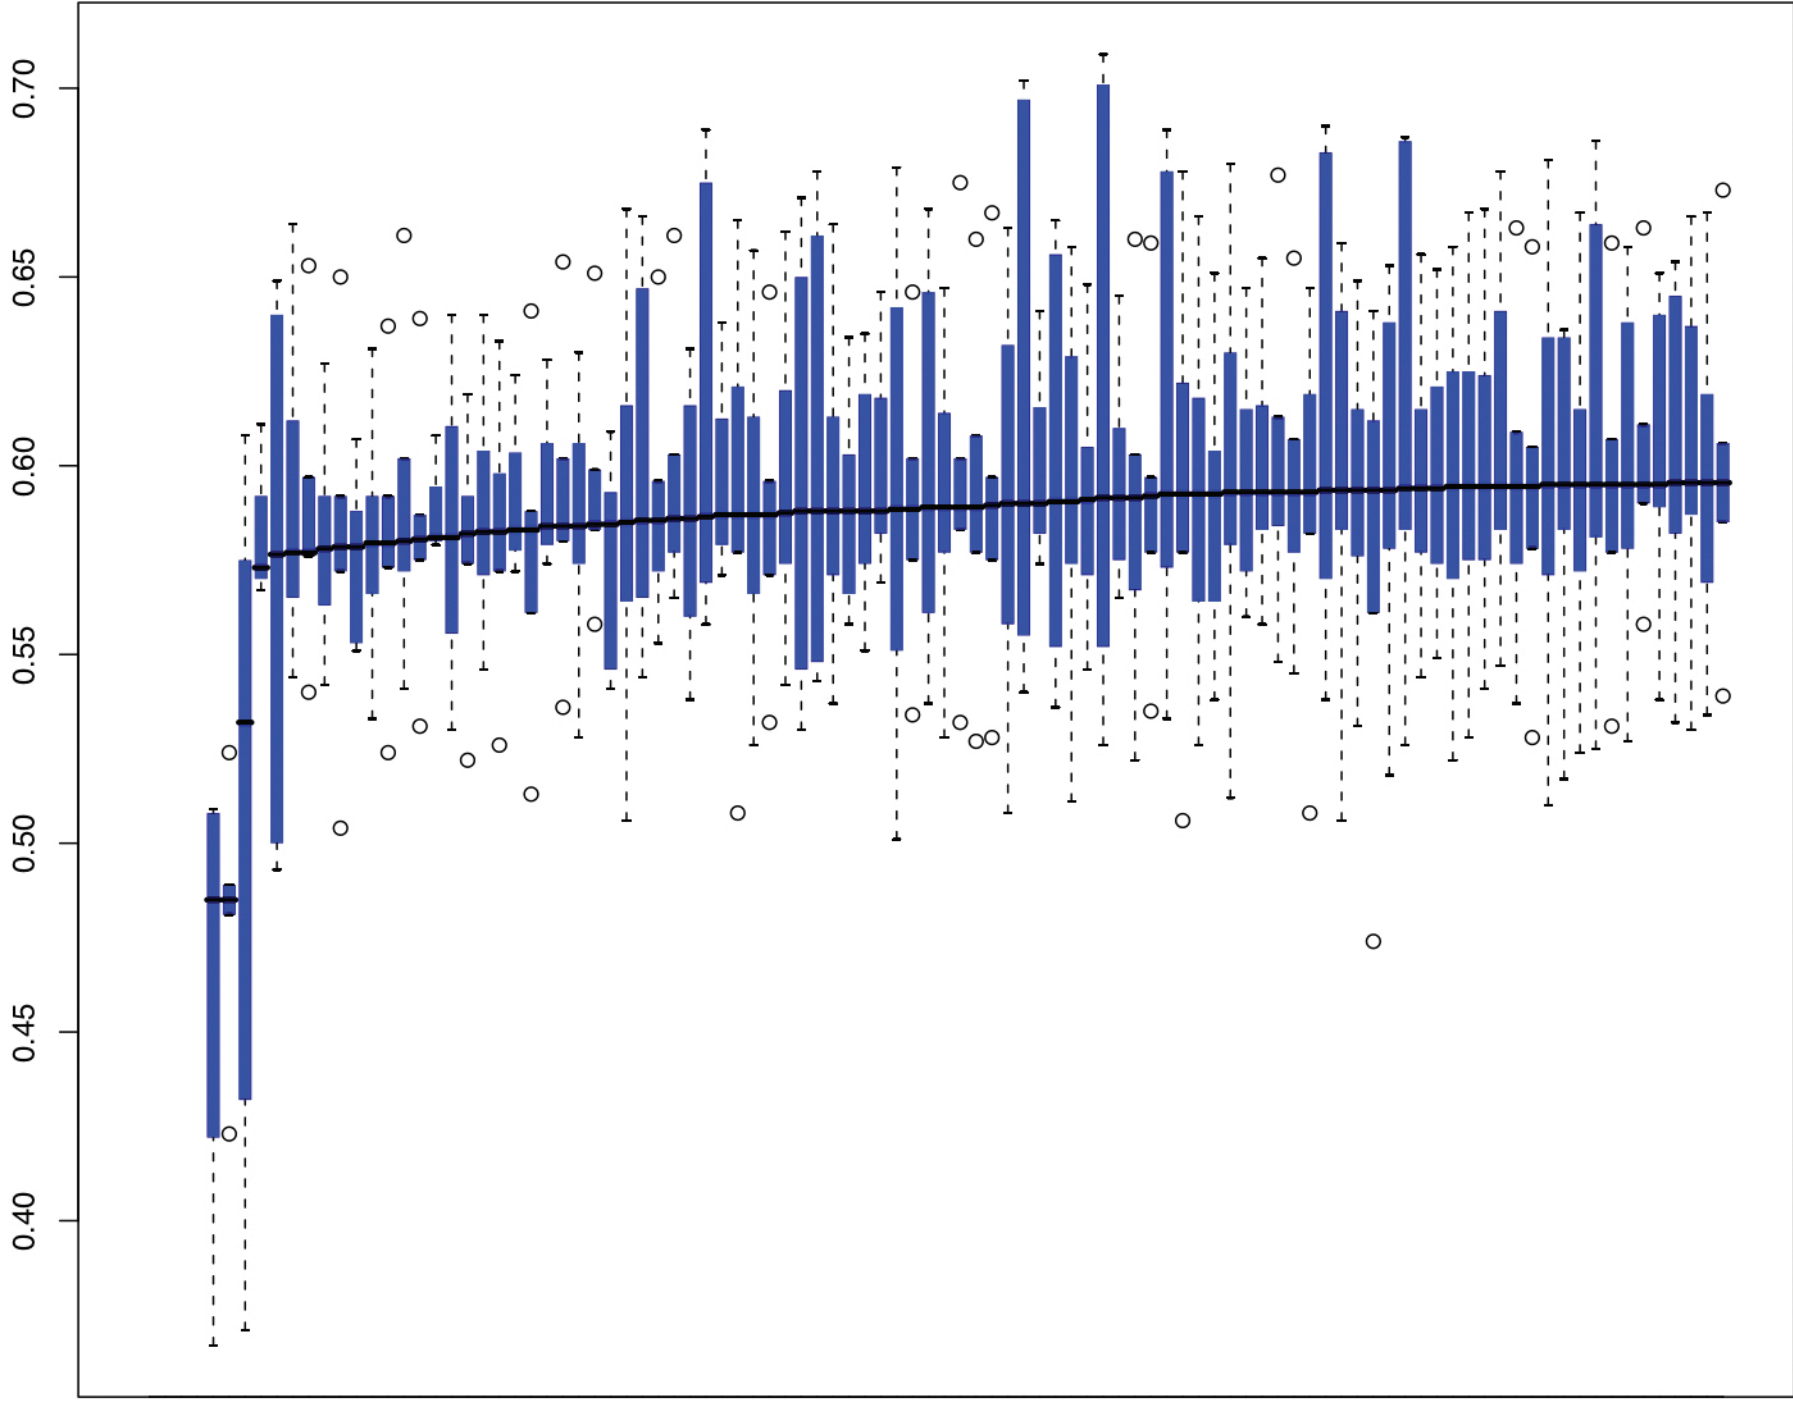

Supplement: ppat.0040009.sg004.pdf [file ppat.0040009.sg004.pdf]

## non-translocated *Shigella* proteins

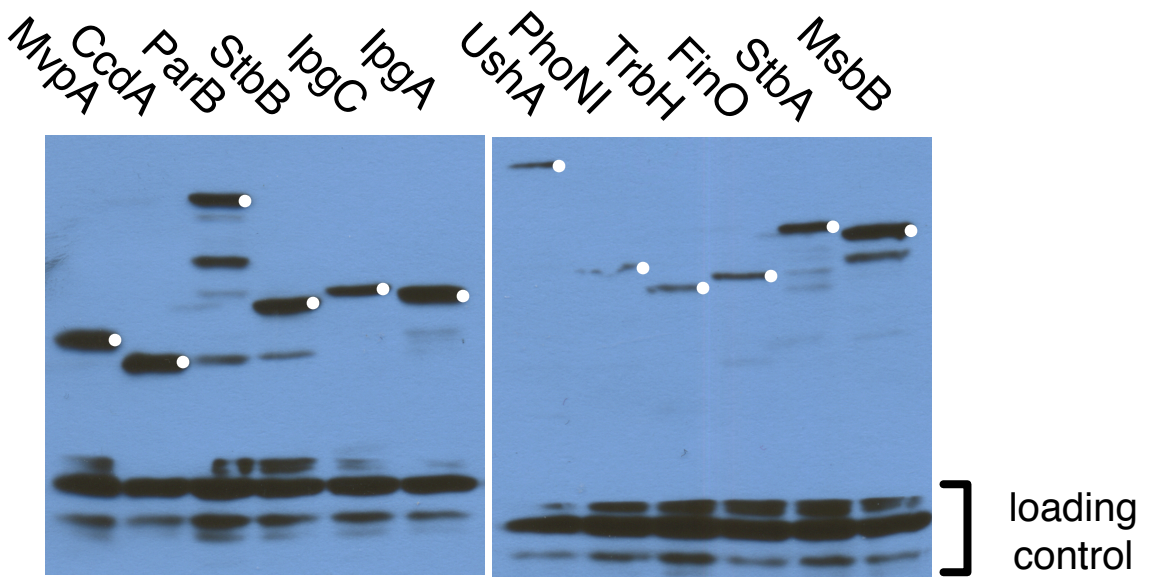

## translocated *Shigella* proteins

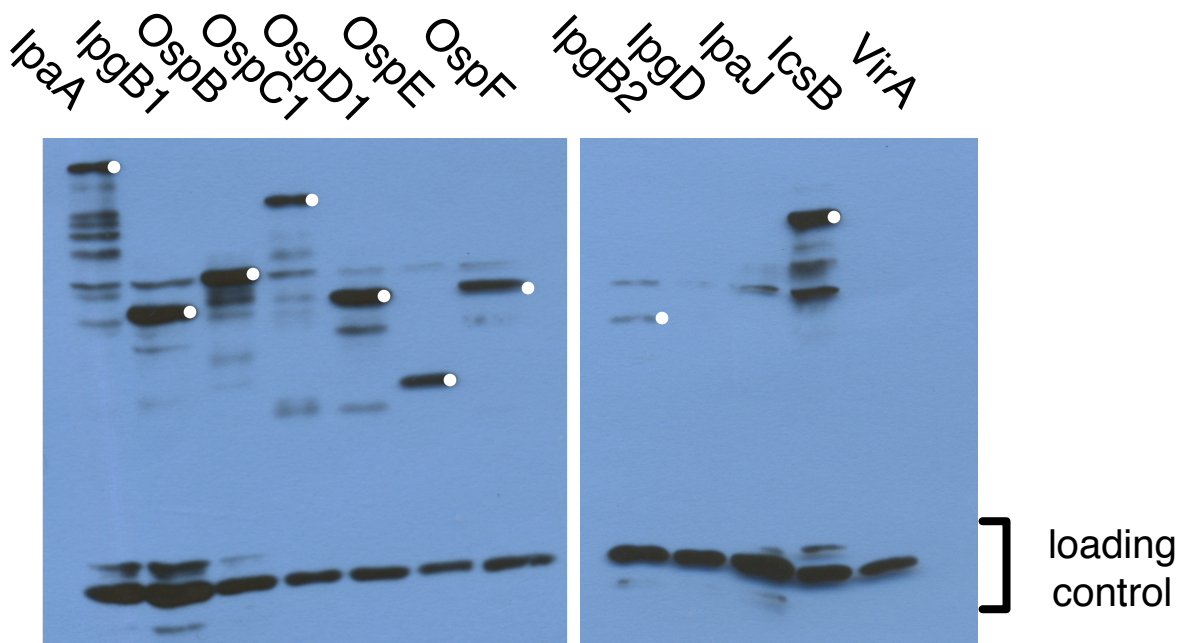

## *Francisella* proteins

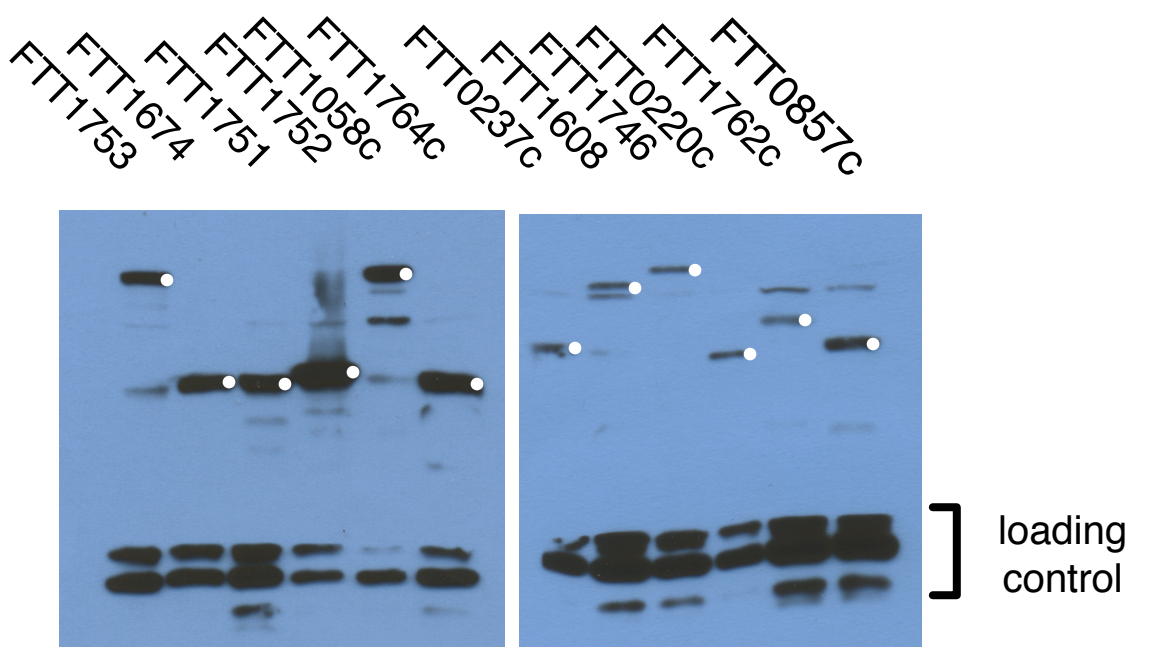

Supplement: ppat.0040009.sg005.pdf [file ppat.0040009.sg005.pdf]
